# Supplementary material
Source: PubMed Central journal article supplement (PMC5648006)
Supplement: NIHMS871049-supplement-supplement_1.pdf [file NIHMS871049-supplement-supplement_1.pdf]

**Table S1.** Changes in echocardiographic markers of myocardial structure and diastolic function, among bariatric surgery patients with histologically-defined NAFLD<sup>1</sup> (n=47) compared to subjects with normal hepatic histology (n=18).

| Echocardiographic measure            | Adjusted* $\beta^1$ [SE] | p-value |
|--------------------------------------|--------------------------|---------|
| Left ventricular systolic function   |                          |         |
| • LVEF                               | -0.93 [1.29]             | 0.044   |
| Left ventricular diastolic function  |                          |         |
| • E-wave                             | -0.07 [0.04]             | 0.035   |
| • E:A ratio                          | -2.20 [2.07]             | 0.051   |
| • Lateral E'                         | -0.63 [0.50]             | 0.024   |
| • Septal E'                          | -0.47 [0.52]             | 0.040   |
| • Deceleration time                  | -6.98 [7.13]             | 0.027   |
| Myocardial structure                 |                          |         |
| • LV mass index                      |                          |         |
| ○ LV mass / BSA, g/m <sup>2</sup>    | 2.65 [2.90]              | 0.053   |
| ○ LV mass / height, g/cm             | 4.39 [3.26]              | 0.032   |
| • LA size index                      |                          |         |
| ○ LA size / BSA, mm/m <sup>2</sup>   | 1.24 [1.]                | 0.033   |
| ○ LA size / height, mm/cm            | 0.08 [0.09]              | 0.049   |
| • LA volume index                    |                          |         |
| ○ LA volume / BSA, ml/m <sup>2</sup> | 2.08 [1.08]              | 0.001   |
| ○ LA volume / height, ml/cm          | 0.15 [0.12]              | 0.037   |
| • Interventricular septum            | 0.52 [0.87]              | 0.062   |
| • LVIDS                              | -0.39 [0.62]             | 0.045   |

Abbreviations: NAFLD, nonalcoholic fatty liver disease (NAFLD); SE, standard error; LVEF, left ventricular ejection fraction; LV, left ventricle; LA, left atrium; BSA, body surface area; IVS, interventricular septum; LVIDS, left ventricular diameter, systole

<sup>1</sup>NAFLD was defined by the presence of any one of the following: hepatic steatosis, defined by grade  $\geq 1$  steatosis without ballooning or lobular inflammation, steatohepatitis (NASH), defined by grade  $\geq 1$  steatosis, lobular inflammation and hepatocyte ballooning, or hepatic fibrosis score  $\geq 1$ .

\*Multivariable linear regression model, adjusted for age, sex, diabetes, body mass index (BMI) and hypertension. For echocardiographic measurements indexed for body surface area (BSA), BMI was not included as a covariate.

**Table S2.** Changes in echocardiographic markers of myocardial structure and diastolic function, among bariatric surgery patients with histologically-defined NASH<sup>1</sup> (n=14), compared to those with hepatic steatosis<sup>2</sup> (n=33)

| Echocardiographic measure            | Adjusted* $\beta^1$ [SE] | p-value |
|--------------------------------------|--------------------------|---------|
| Left ventricular systolic function   |                          |         |
| • LVEF                               | -1.26 [1.12]             | 0.020   |
| Left ventricular diastolic function  |                          |         |
| • E-wave                             | -0.21 [0.06]             | 0.002   |
| • E:A ratio                          | -3.43 [2.84]             | 0.037   |
| • Lateral E'                         | -1.01 [0.73]             | 0.040   |
| • Septal E'                          | -0.96 [0.5]              | 0.044   |
| • Deceleration time                  | -6.41 [5.90]             | 0.051   |
| Myocardial structure                 |                          |         |
| • LV mass index                      |                          |         |
| ○ LV mass / BSA, g/m <sup>2</sup>    | 5.42 [3.13]              | 0.001   |
| ○ LV mass / height, g/cm             | 6.49 [5.24]              | 0.001   |
| • LA size index                      |                          |         |
| ○ LA size / BSA, mm/m <sup>2</sup>   | 2.98 [1.35]              | 0.023   |
| ○ LA size / height, mm/cm            | 0.13 [0.09]              | 0.036   |
| • LA volume index                    |                          |         |
| ○ LA volume / BSA, ml/m <sup>2</sup> | 4.27 [2.81]              | 0.024   |
| ○ LA volume / height, ml/cm          | 0.16 [0.06]              | 0.001   |
| • Interventricular septum            | 0.4 [0.20]               | 0.033   |
| • LVIDS                              | -0.59 [0.22]             | 0.009   |

Abbreviations: NASH, nonalcoholic steatohepatitis; SE, standard error; LVEF, left ventricular ejection fraction; LV, left ventricle; LA, left atrium; BSA, body surface area; IVS, interventricular septum; LVIDS, left ventricular diameter, systole

<sup>1</sup>NASH was defined by grade  $\geq 1$  steatosis, lobular inflammation and hepatocyte ballooning, with or without fibrosis

<sup>2</sup>Hepatic steatosis was defined by grade  $\geq 1$  steatosis without ballooning or lobular inflammation

\*Multivariable linear regression model, adjusted for age, sex, diabetes, body mass index (BMI) and hypertension. For echocardiographic measurements indexed for body surface area (BSA), BMI was not included as a covariate.

**Table S3.** Comparison of histological findings in included analysis cohort (N=65) to the total cohort of bariatric surgery patients with available hepatic histology, from January 1, 2005 to August 1, 2016 (N=332).

|                            | Analysis cohort<br>(N=65) | NASH patients <sup>1</sup><br>(N=14) | Total biopsied cohort*<br>(N=332) |
|----------------------------|---------------------------|--------------------------------------|-----------------------------------|
| NAS score                  | 3.1 (2.0)                 | 4.6 (1.4)                            | 3.0 (2.0)                         |
| Fibrosis stage             | 0.63 (0.96)               | 0.94 (0.60)                          | 0.57 (1.08)                       |
| Ballooning score           | 0.89 (0.88)               | 1.02 (0.90)                          | 0.85 (0.86)                       |
| Lobular inflammation score | 1.07 (0.86)               | 2.05 (0.74)                          | 1.04 (0.85)                       |
| Steatosis score            | 1.50 (0.84)               | 2.07 (0.86)                          | 1.48 (0.85)                       |

All values represented as mean (standard deviation)

Abbreviations: NAS, NAFLD activity score; NASH, nonalcoholic steatohepatitis

<sup>1</sup>NASH was defined by grade  $\geq 1$  steatosis, lobular inflammation and hepatocyte ballooning, with or without fibrosis

\*Total biopsied cohort from Massachusetts General Hospital
